# Supplementary material
Source: Springer Nature journal article supplement (https://www.springermedizin.de/resource/supplementary/12889_2013_5549_MOESM7_ESM.pdf/9495640)
Supplement: MOESM7 [file 9495640]

| ATC-CLASS                                                                | 0-2 years  | 3-6 years   | 7-10 years | 11-13 years | 14-17 years |
|--------------------------------------------------------------------------|------------|-------------|------------|-------------|-------------|
|                                                                          | n (%)      | n (%)       | n (%)      | n (%)       | n (%)       |
| <b>A00 Alimentary tract and metabolism</b>                               | 328 (21.3) | 255 (49.5)  | 172 (50.0) | 108 (47.8)  | 130 (43.0)  |
| <b>B00 Blood and blood forming organs</b>                                | 2 (13.3)   | 1 (14.3)    | 2 (50.0)   | 10 (52.6)   | 9 (32.1)    |
| <b>C00 Cardiovascular system</b>                                         | 3 (100)    | 2 (40.0)    | 9 (64.3)   | 9 (90.0)    | 16 (61.5)   |
| <b>D00 Dermatologicals</b>                                               | 102 (26.6) | 106 (30.1)  | 110 (31.0) | 75 (37.1)   | 92 (32.1)   |
| <b>G00 Genito urinary system and sex hormones</b>                        | 4 (66.7)   | 1 (10.0)    | 6 (50.0)   | 2 (25.0)    | 53 (11.5)   |
| <b>H00 Systemic hormon. preparations excl. sex hormones and insulins</b> | 3 (14.3)   | 11 (19.3)   | 7 (13.7)   | 7 (9.5)     | 14 (15.2)   |
| <b>J00 Antiinfectives for systemic use</b>                               | 29 (32.2)  | 41 (36.6)   | 18 (30.5)  | 15 (31.9)   | 19 (28.8)   |
| <b>L00 Antineoplastic and immunmodulating agents</b>                     | 7 (70.0)   | 16 (57.1)   | 8 (42.1)   | 6 (42.9)    | 7 (50.0)    |
| <b>M00 Musculo-skeletal system</b>                                       | 13 (25.5)  | 17 (23.3)   | 18 (16.8)  | 21 (18.9)   | 28 (13.4)   |
| <b>N00 Nervous system</b>                                                | 20 (12.7)  | 21 (20.2)   | 51 (25.5)  | 39 (16.5)   | 44 (11.1)   |
| <b>P00 Antiparasitic products insecticides and repellents</b>            |            | 1 (33.3)    | 1 (20.0)   | 1 (14.3)    | 0           |
| <b>R00 Respiratory system</b>                                            | 356 (39.1) | 493 (40.4)  | 288 (35.7) | 146 (30.7)  | 133 (27.7)  |
| <b>S00 Sensory organs</b>                                                | 30 (56.6)  | 30 (42.3)   | 13 (61.9)  | 11 (36.7)   | 8 (32.0)    |
| <b>V00 Various</b>                                                       | 16 (16.3)  | 6 (25.0)    | 7 (16.7)   | 1 (5.6)     | 5 (13.9)    |
| <b>Z00 Homoeopathics</b>                                                 | 41 (23.2)  | 47 (20.3)   | 37 (19.2)  | 22 (20.6)   | 22 (23.9)   |
| <b>TOTAL n = 12,667</b>                                                  | 954 (27.1) | 1048 (37.3) | 747 (33.5) | 473 (29.8)  | 580 (23.0)  |
